# Supplementary material for: Mitigating the impact of image processing variations on tumour [18F]-FDG-PET radiomic feature robustness
Source: PubMed Central journal article supplement (PMC11251269; doi:10.1038/s41598-024-67239-8), 2024-07-15

# Supplementary materials

## **Mitigating the impact of image processing variations on tumour [ $^{18}\text{F}$ ]-FDG-PET radiomic feature robustness**

Syafiq Ramlee \*, Roido Manavaki, Luigi Aloj, Lorena Escudero Sanchez

\* Correspondence: Syafiq Ramlee, [masr4@cam.ac.uk](mailto:masr4@cam.ac.uk)

## Supplementary Table ST1

The number of features (and corresponding percentage proportion, out of the 107 features extracted) for each robustness category, stratified by intensity discretisation or voxel interpolation scheme and cancer type.

|                       | Robust      |             |             | Conditionally robust |             |             | Not robust  |             |             |
|-----------------------|-------------|-------------|-------------|----------------------|-------------|-------------|-------------|-------------|-------------|
|                       | NSCLC       | Melanoma    | Lymphoma    | NSCLC                | Melanoma    | Lymphoma    | NSCLC       | Melanoma    | Lymphoma    |
| <b>Discretisation</b> |             |             |             |                      |             |             |             |             |             |
| FBW                   | 33<br>(30%) | 31<br>(29%) | 34<br>(32%) | 41<br>(38%)          | 65<br>(61%) | 59<br>(55%) | 33<br>(31%) | 11<br>(10%) | 14<br>(13%) |
| FBN                   | 36<br>(34%) | 33<br>(31%) | 34<br>(32%) | 24<br>(22%)          | 35<br>(33%) | 22<br>(21%) | 47<br>(44%) | 39<br>(36%) | 51<br>(48%) |
| <b>Interpolation</b>  |             |             |             |                      |             |             |             |             |             |
| Linear                | 38<br>(36%) | 30<br>(28%) | 35<br>(33%) | 60<br>(56%)          | 67<br>(63%) | 64<br>(60%) | 9<br>(8%)   | 10<br>(9%)  | 8<br>(7%)   |
| Nearest-neighbour     | 41<br>(38%) | 31<br>(29%) | 42<br>(39%) | 61<br>(57%)          | 71<br>(66%) | 60<br>(56%) | 5<br>(5%)   | 5<br>(5%)   | 5<br>(5%)   |
| B-spline              | 39<br>(36%) | 31<br>(29%) | 35<br>(33%) | 57<br>(53%)          | 66<br>(62%) | 64<br>(60%) | 11<br>(10%) | 10<br>(9%)  | 8<br>(7%)   |
| Gaussian              | 39<br>(36%) | 36<br>(34%) | 38<br>(36%) | 55<br>(51%)          | 61<br>(57%) | 59<br>(55%) | 13<br>(12%) | 10<br>(9%)  | 10<br>(9%)  |



## Supplementary Table ST2

The number of features (and corresponding percentage proportion, out of the 107 features extracted) for each correctability category, stratified by intensity discretisation or voxel interpolation scheme and cancer type.

|                       | Correctable |             |             | Moderately correctable |             |             | Not correctable |             |             |
|-----------------------|-------------|-------------|-------------|------------------------|-------------|-------------|-----------------|-------------|-------------|
|                       | NSCLC       | Melanoma    | Lymphoma    | NSCLC                  | Melanoma    | Lymphoma    | NSCLC           | Melanoma    | Lymphoma    |
| <b>Discretisation</b> |             |             |             |                        |             |             |                 |             |             |
| FBW                   | 30<br>(28%) | 22<br>(20%) | 27<br>(25%) | 37<br>(35%)            | 37<br>(35%) | 40<br>(37%) | 7<br>(7%)       | 17<br>(16%) | 6<br>(6%)   |
| FBN                   | 30<br>(28%) | 29<br>(27%) | 32<br>(30%) | 38<br>(36%)            | 34<br>(32%) | 31<br>(29%) | 3<br>(3%)       | 11<br>(10%) | 10<br>(9%)  |
| <b>Interpolation</b>  |             |             |             |                        |             |             |                 |             |             |
| Linear                | 30<br>(28%) | 25<br>(23%) | 29<br>(27%) | 29<br>(27%)            | 36<br>(34%) | 33<br>(30%) | 10<br>(9%)      | 16<br>(15%) | 10<br>(9%)  |
| Nearest-neighbour     | 24<br>(22%) | 16<br>(15%) | 16<br>(15%) | 27<br>(25%)            | 39<br>(36%) | 36<br>(34%) | 15<br>(14%)     | 21<br>(20%) | 13<br>(12%) |
| B-spline              | 29<br>(27%) | 23<br>(22%) | 28<br>(26%) | 30<br>(28%)            | 34<br>(32%) | 30<br>(28%) | 9<br>(8%)       | 19<br>(18%) | 14<br>(13%) |
| Gaussian              | 31<br>(29%) | 25<br>(23%) | 28<br>(26%) | 27<br>(25%)            | 27<br>(25%) | 28<br>(26%) | 10<br>(9%)      | 19<br>(18%) | 13<br>(12%) |

## Supplementary Table ST3

The most correctable feature for each intensity discretisation or voxel interpolation scheme, across the cancers investigated.

|                       | <b>NSCLC</b>               | <b>Melanoma</b>         | <b>Lymphoma</b>           |
|-----------------------|----------------------------|-------------------------|---------------------------|
| <b>Discretisation</b> |                            |                         |                           |
| FBW                   | GLCM<br>DifferenceVariance | GLCM<br>Contrast        | GLCM<br>Contrast          |
| FBN                   | First-order<br>Uniformity  | GLCM<br>ClusterTendency | First-order<br>Uniformity |
| <b>Interpolation</b>  |                            |                         |                           |
| Linear                | First-order<br>Energy      | GLSZM<br>ZonePercentage | First-order<br>Energy     |
| Nearest-<br>neighbour | First-order<br>Energy      | First-order<br>Energy   | First-order<br>Energy     |
| B-spline              | First-order<br>Energy      | GLSZM<br>ZonePercentage | First-order<br>Energy     |
| Gaussian              | First-order<br>Energy      | GLSZM<br>ZonePercentage | First-order<br>Energy     |

# Supplementary Figure SF1

Robustness categorisations mosaic for the 107 radiomic features tested, stratified by image processing algorithm and cancer type.

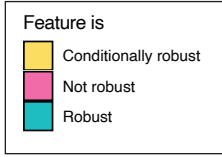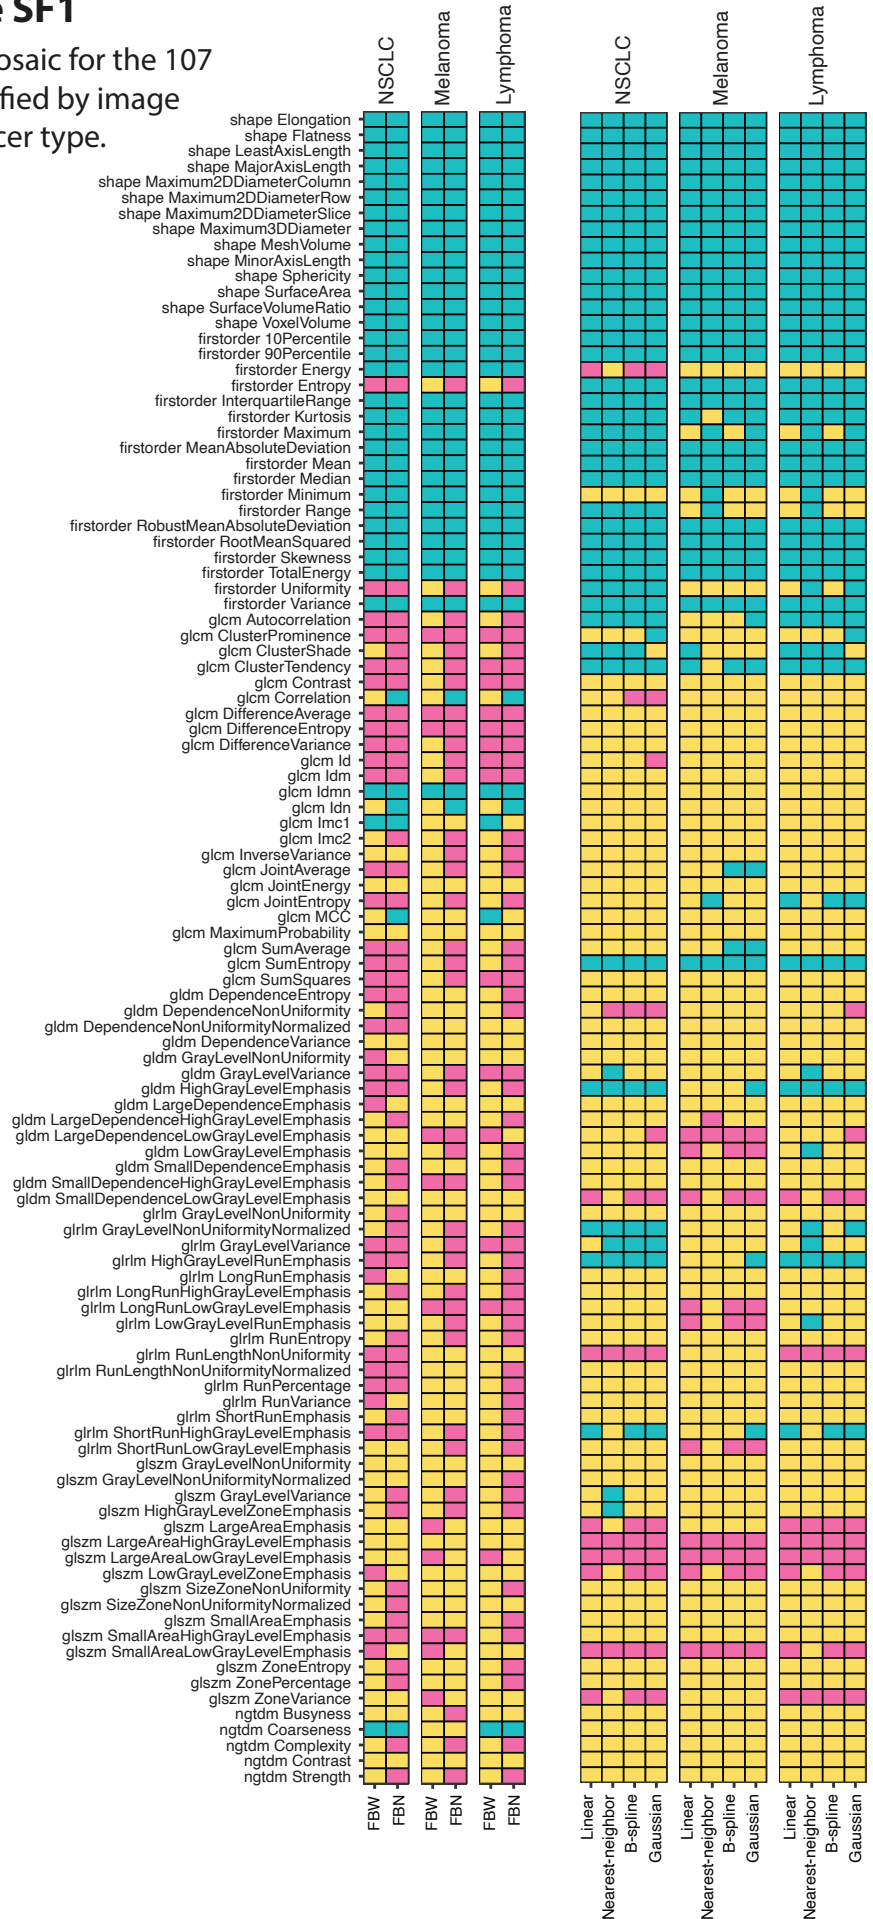











































# Supplementary Figure SF5

Correctability categorisations mosaic for radiomic features not meeting the robust criteria, stratified by image processing algorithm and cancer type.

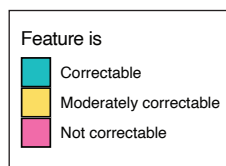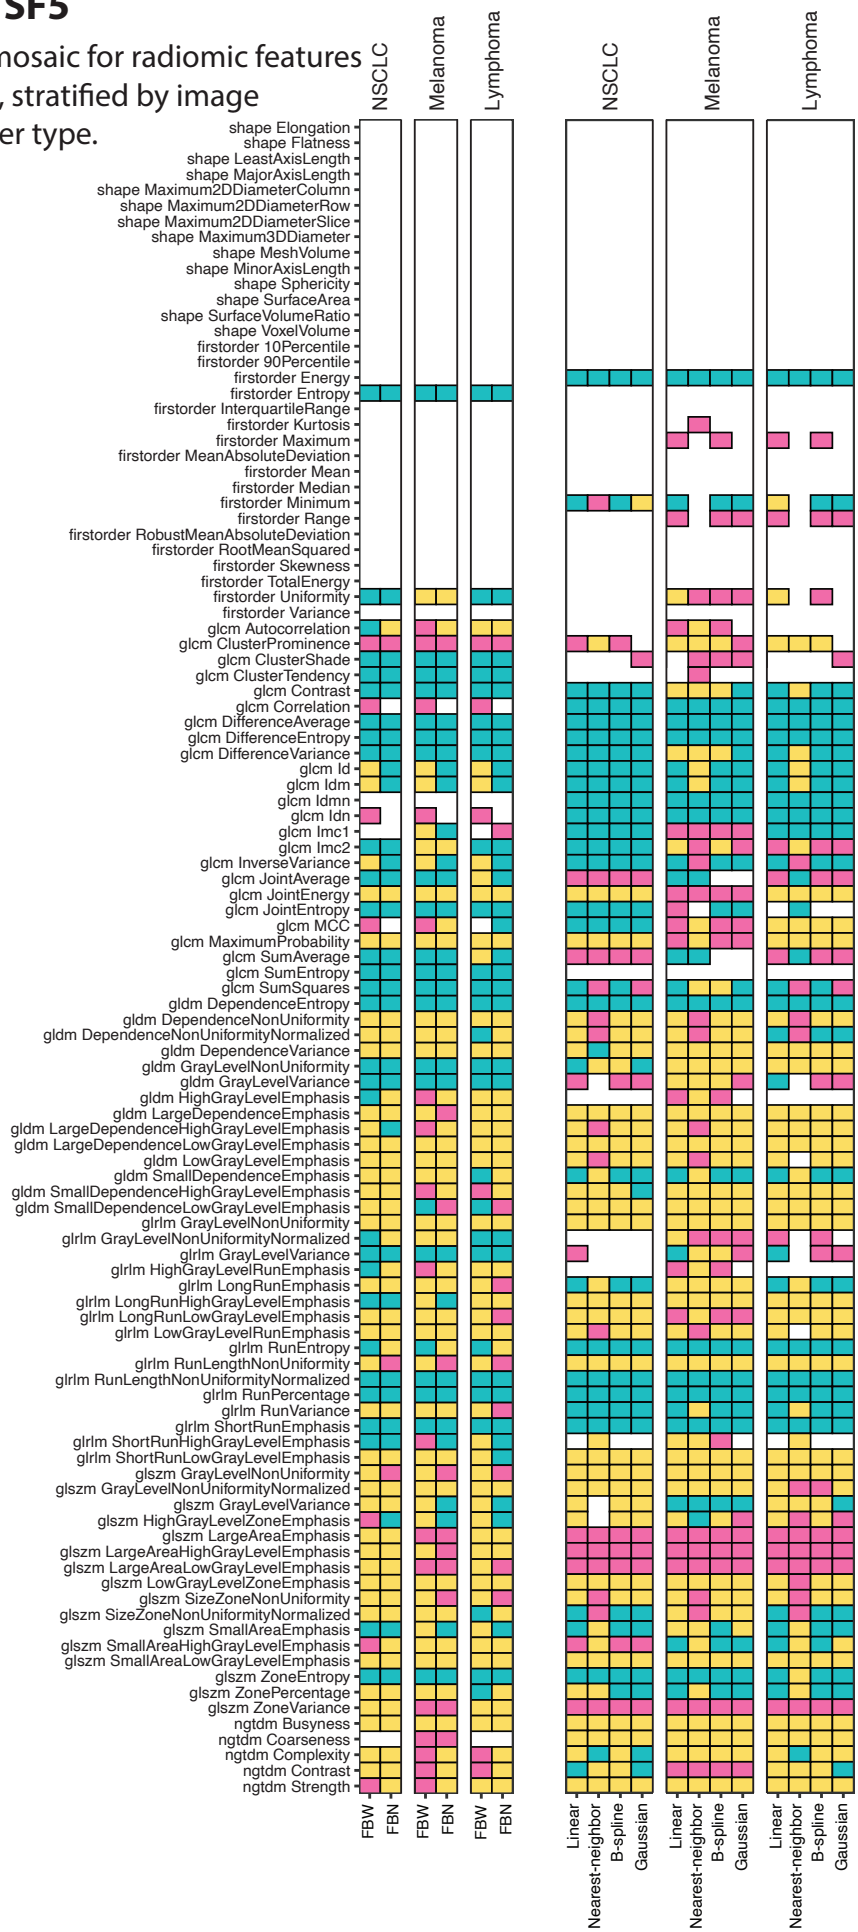

# Supplementary Figure SF6

Best-fit equations used for correction of radiomic features not meeting the robust criteria, stratified by image processing algorithm and cancer type.

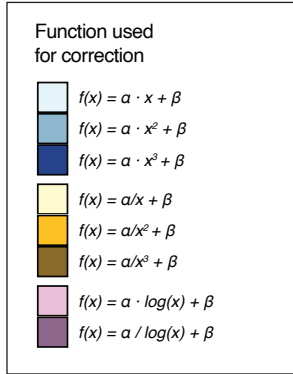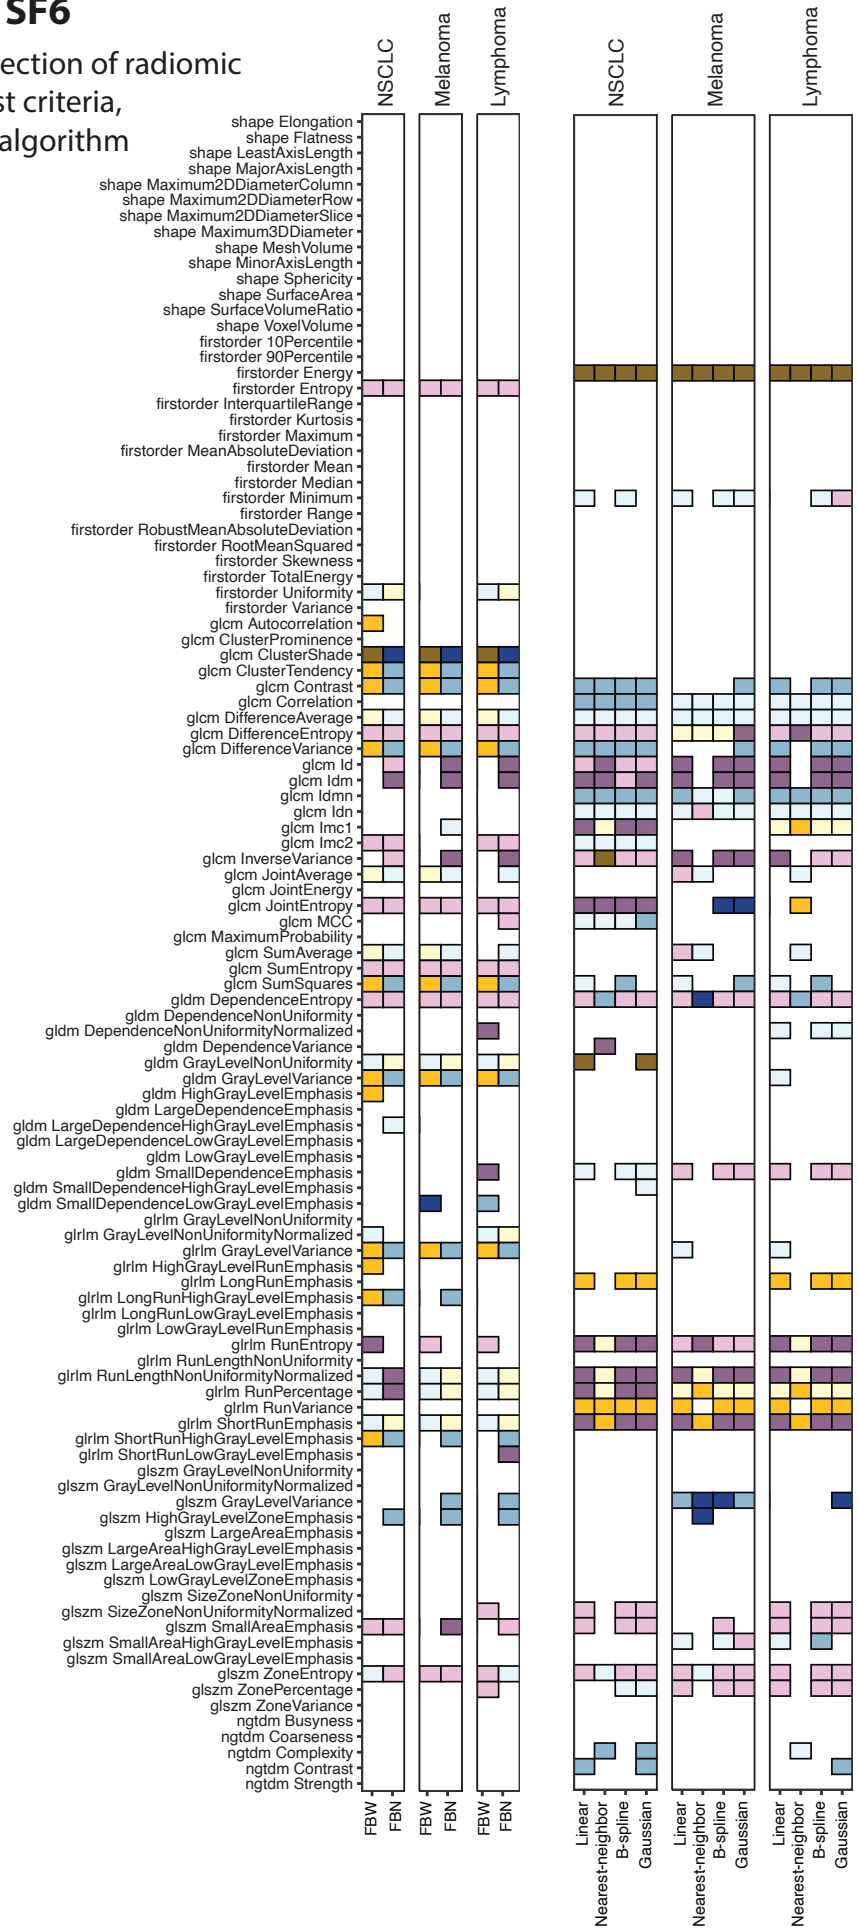



## Supplementary Figure SF7

Dumbbell plots showing the change in  $CV_{mean}$  and  $|r_{rm}|$  for correctable features in NSCLC, when considering the different discretisation (a-b) and interpolation (c-f) algorithms tested. Features are ranked by the change in feature variability and correlation upon correction.

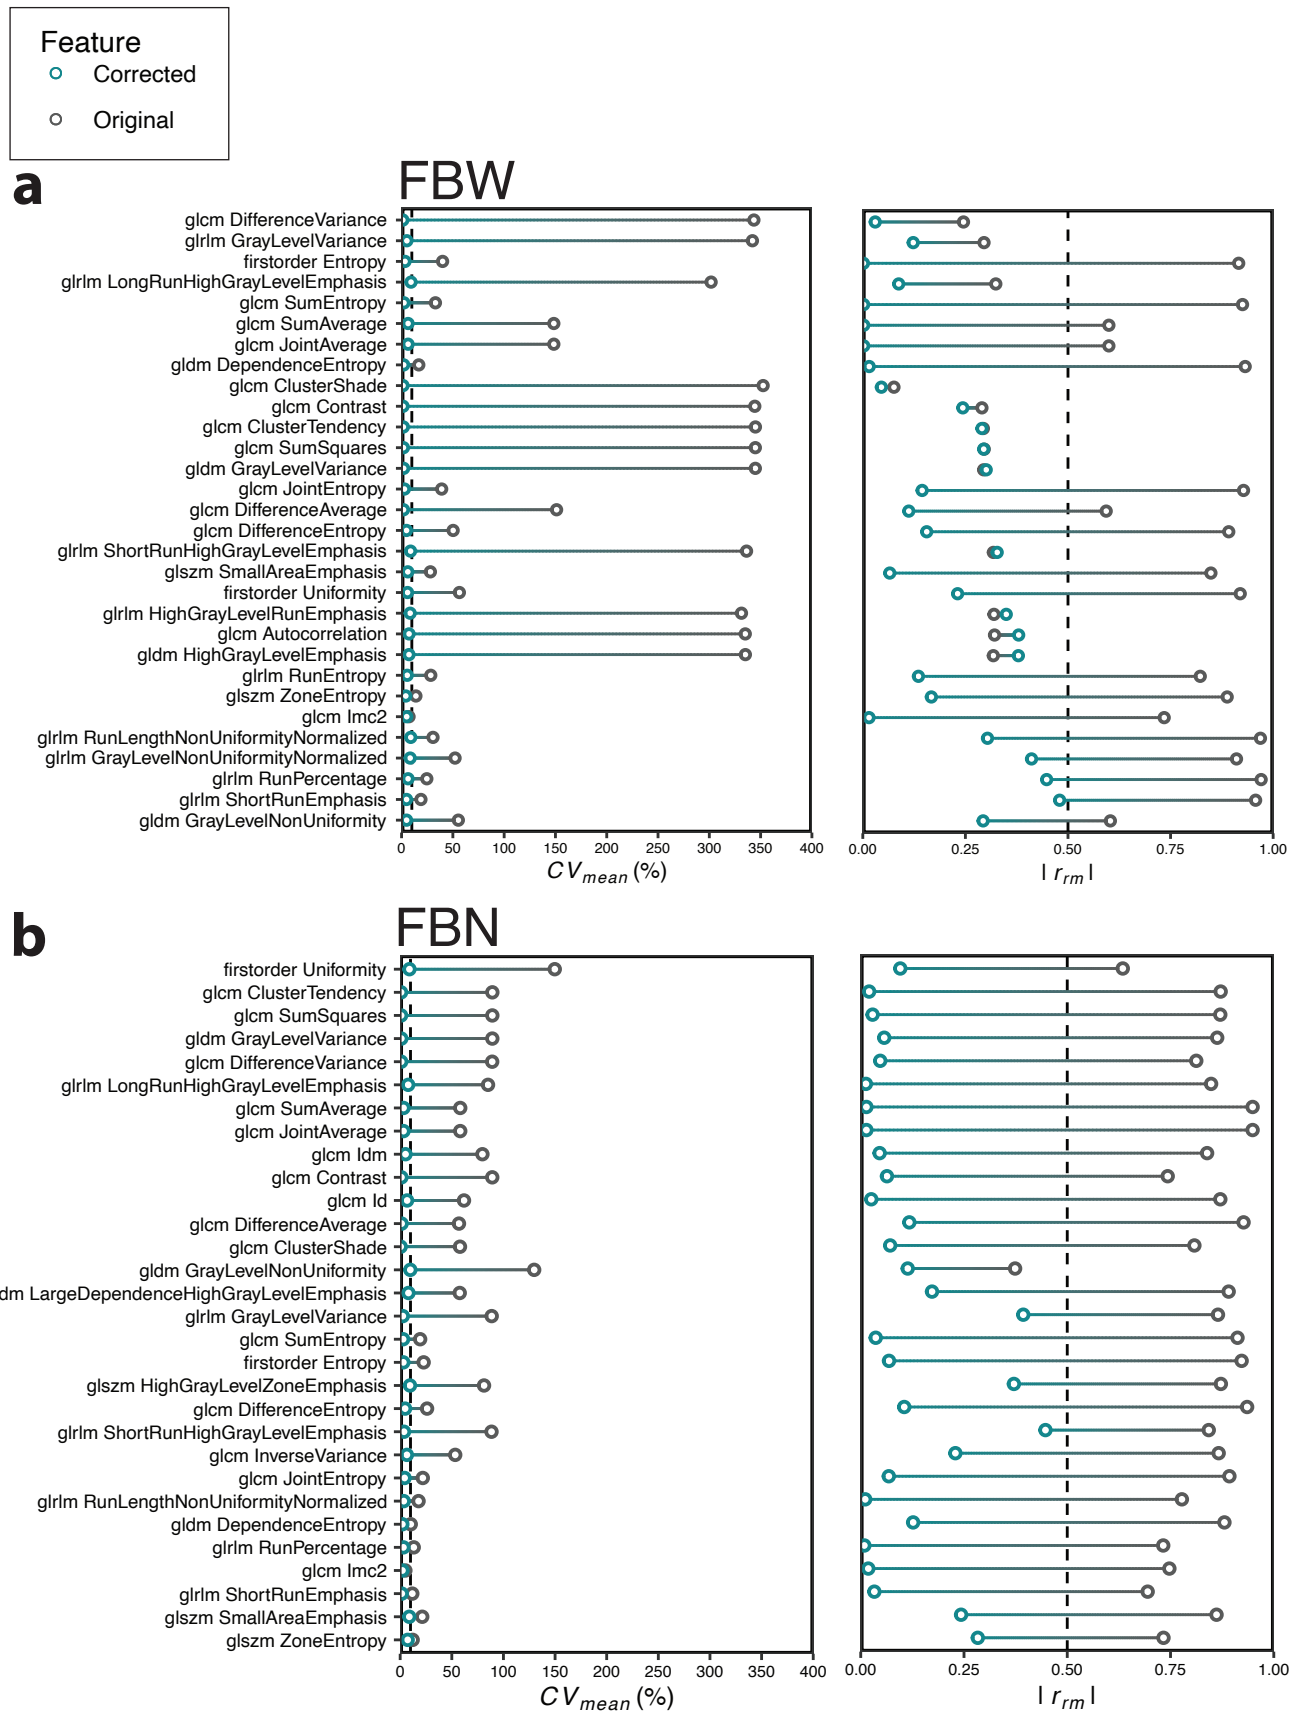



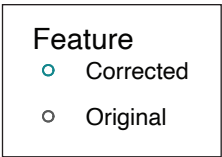

**c**

**Linear**

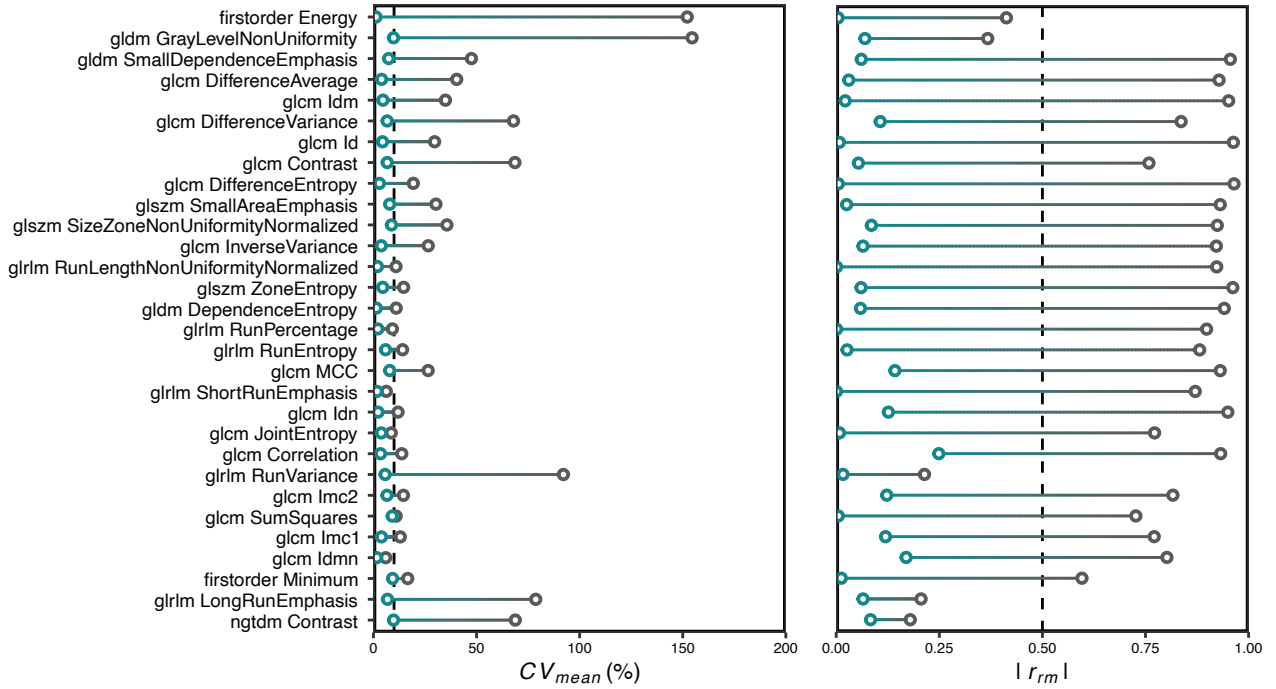

**d**

**Nearest-neighbour**

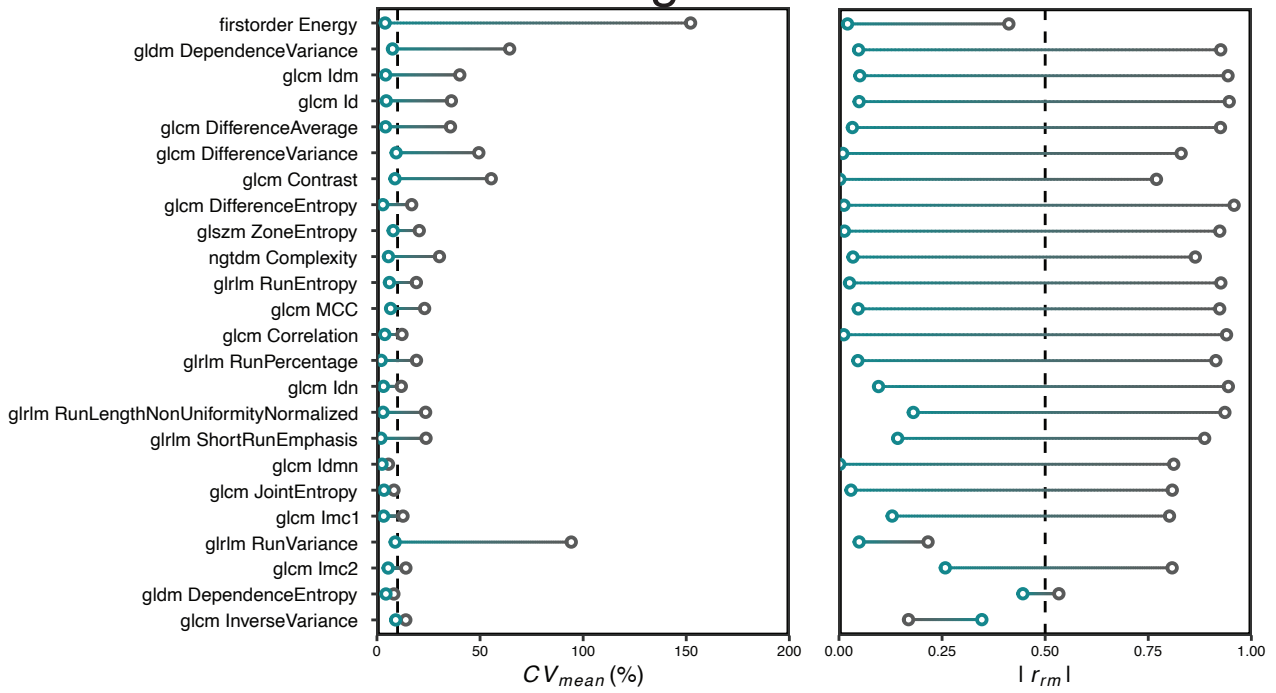

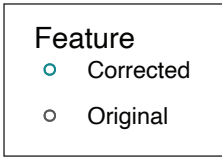

**e**

**B-spline**

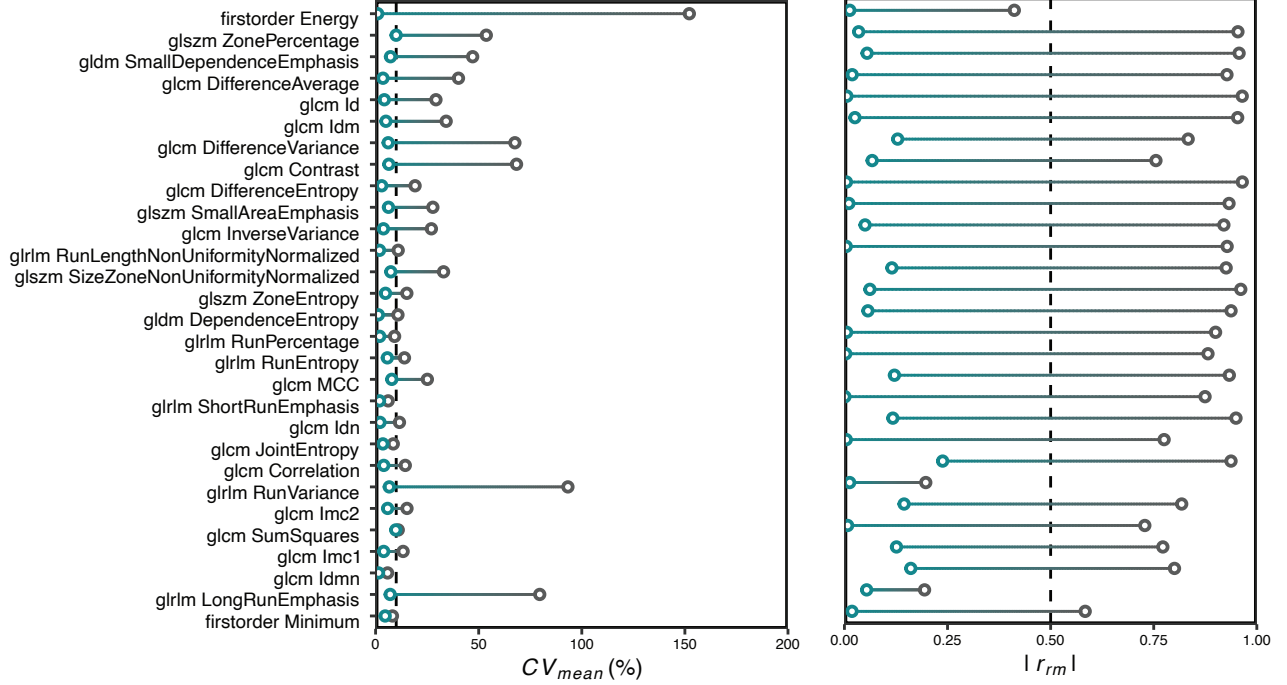

**f**

**Gaussian**

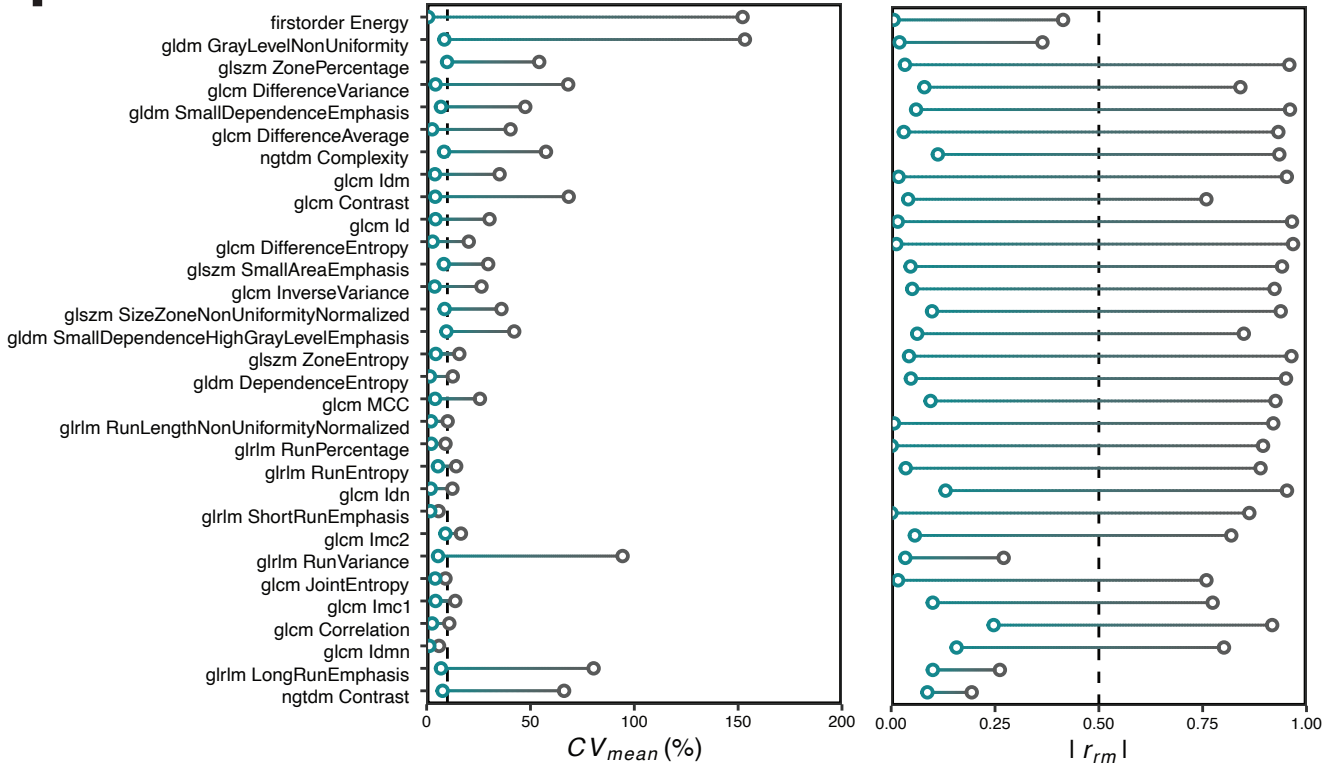

## Supplementary Figure SF8

Dumbbell plots showing the change in  $CV_{mean}$  and  $|r_{rm}|$  for correctable features in melanoma, when considering the different discretisation (a-b) and interpolation (c-f) algorithms tested. Features are ranked by the change in feature variability and correlation upon correction.

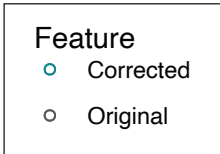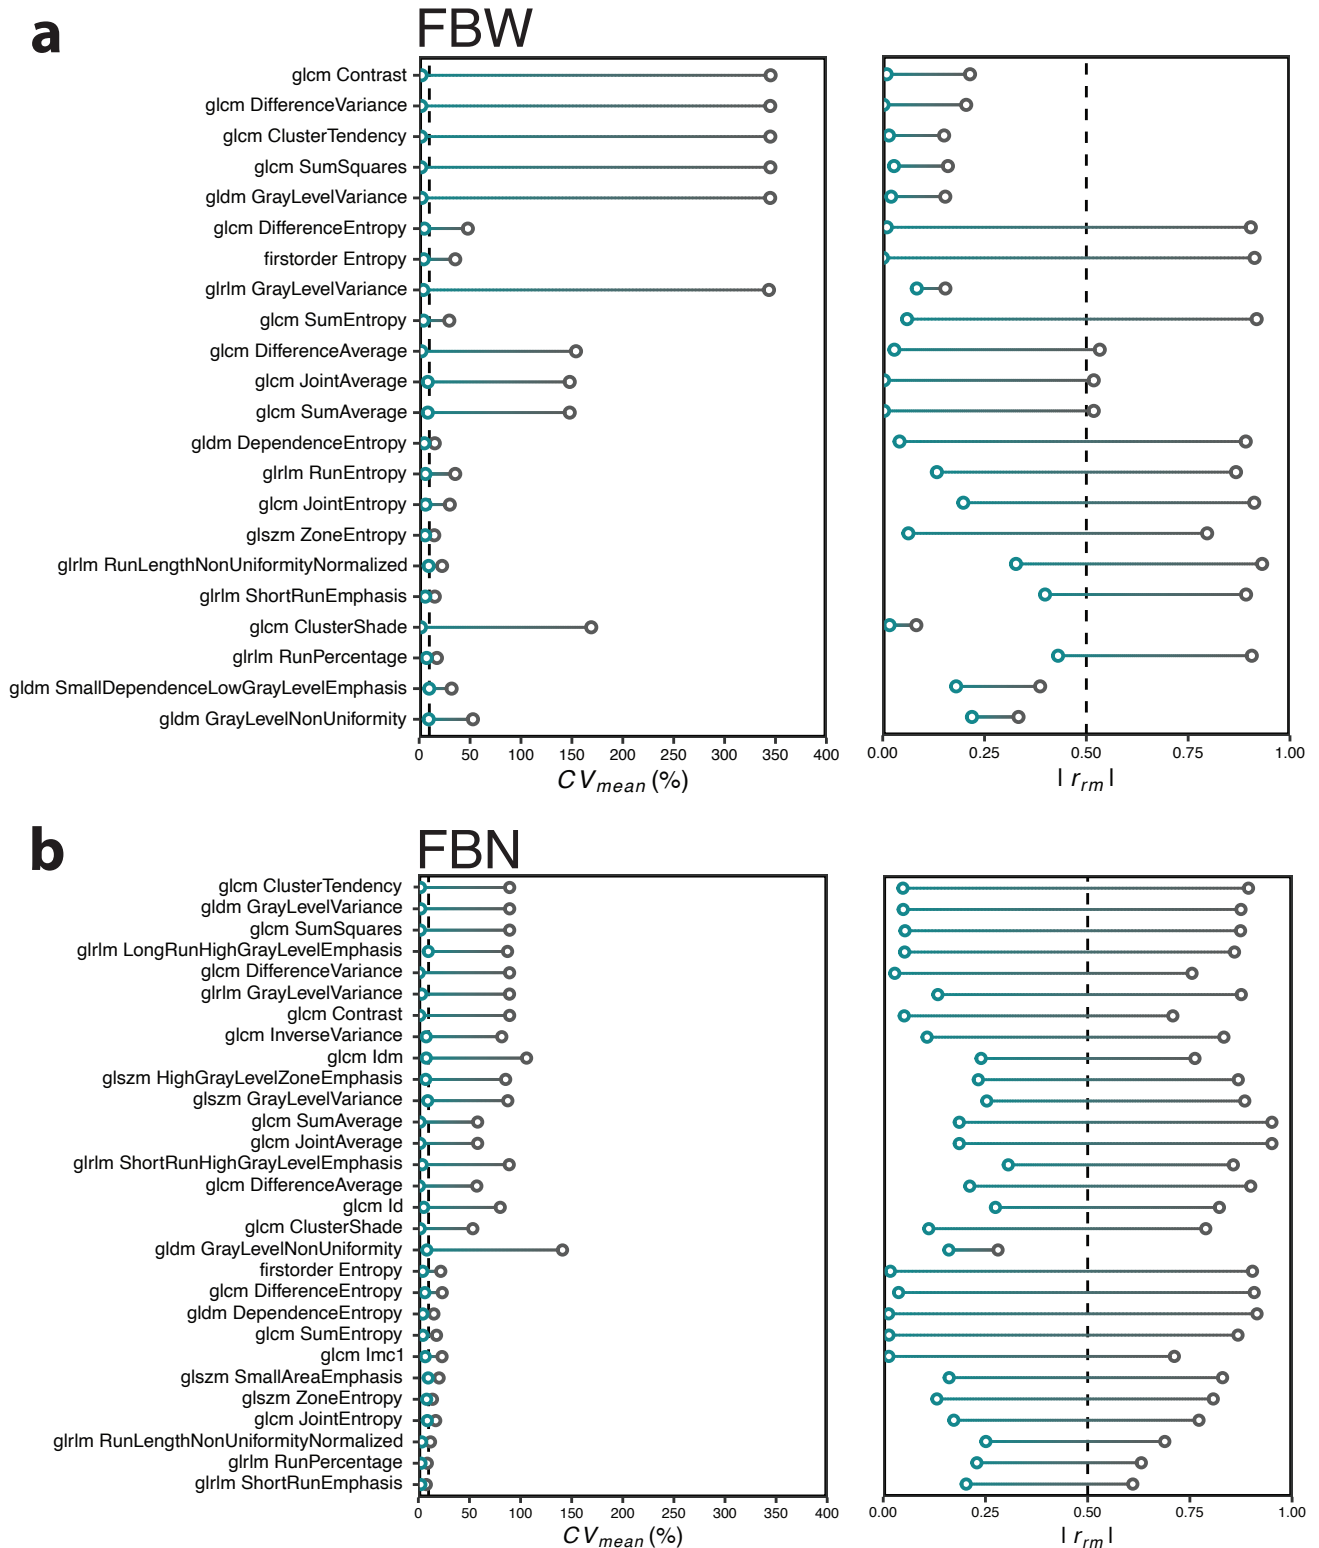

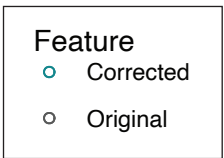

**c**

**Linear**

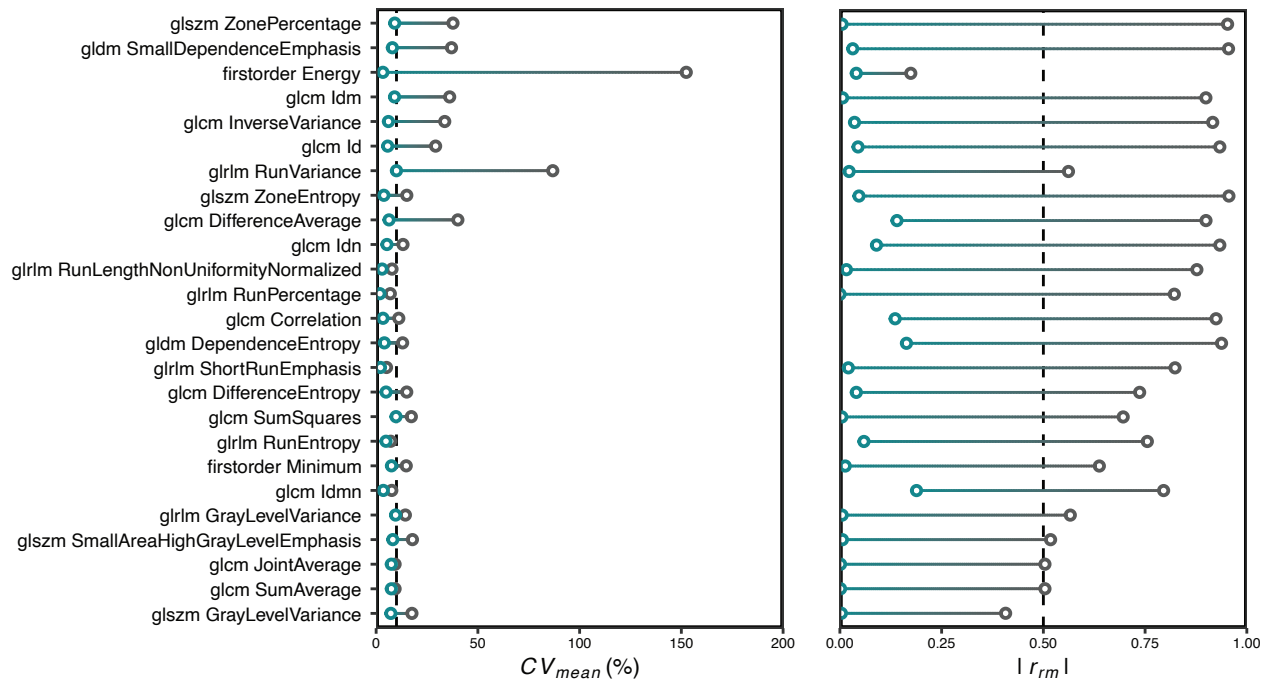

**d**

**Nearest-neighbour**

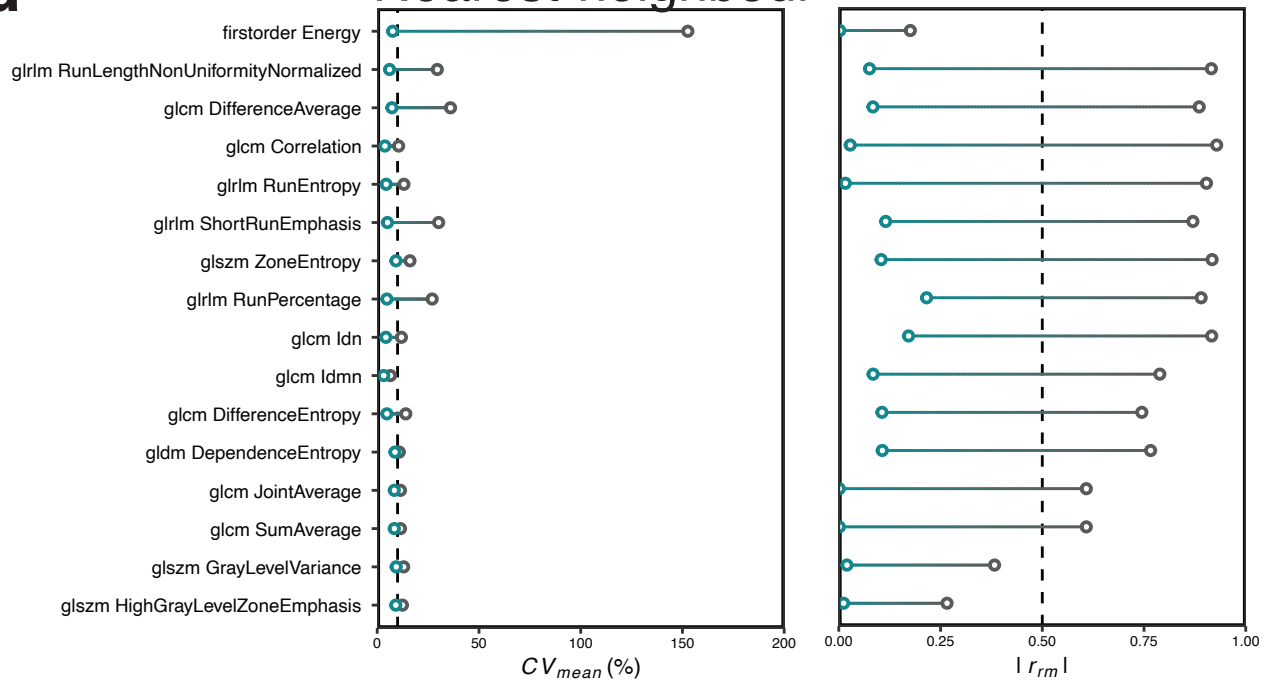

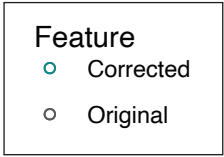

**e**

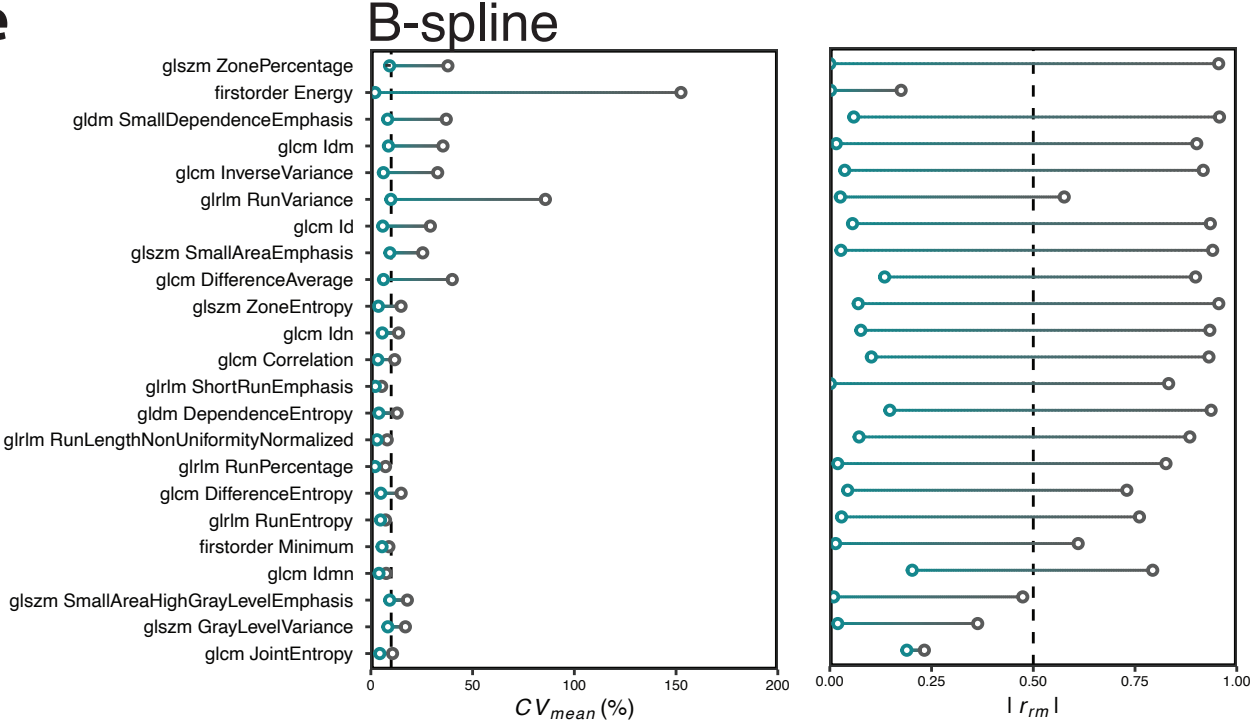

**f**

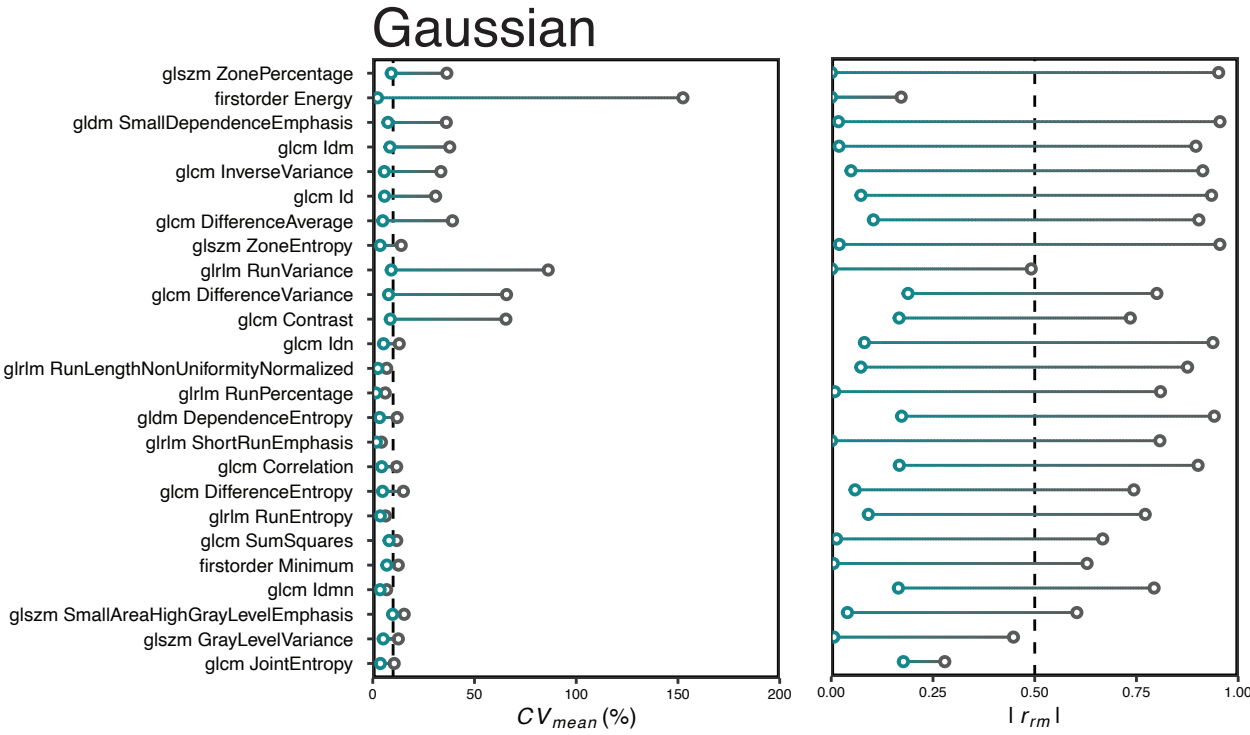

## Supplementary Figure SF9

Dumbbell plots showing the change in  $CV_{mean}$  and  $|r_{rm}|$  for correctable features in lymphoma, when considering the different discretisation (a-b) and interpolation (c-f) algorithms tested. Features are ranked by the change in feature variability and correlation upon correction.

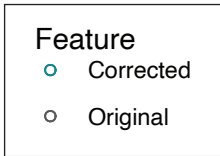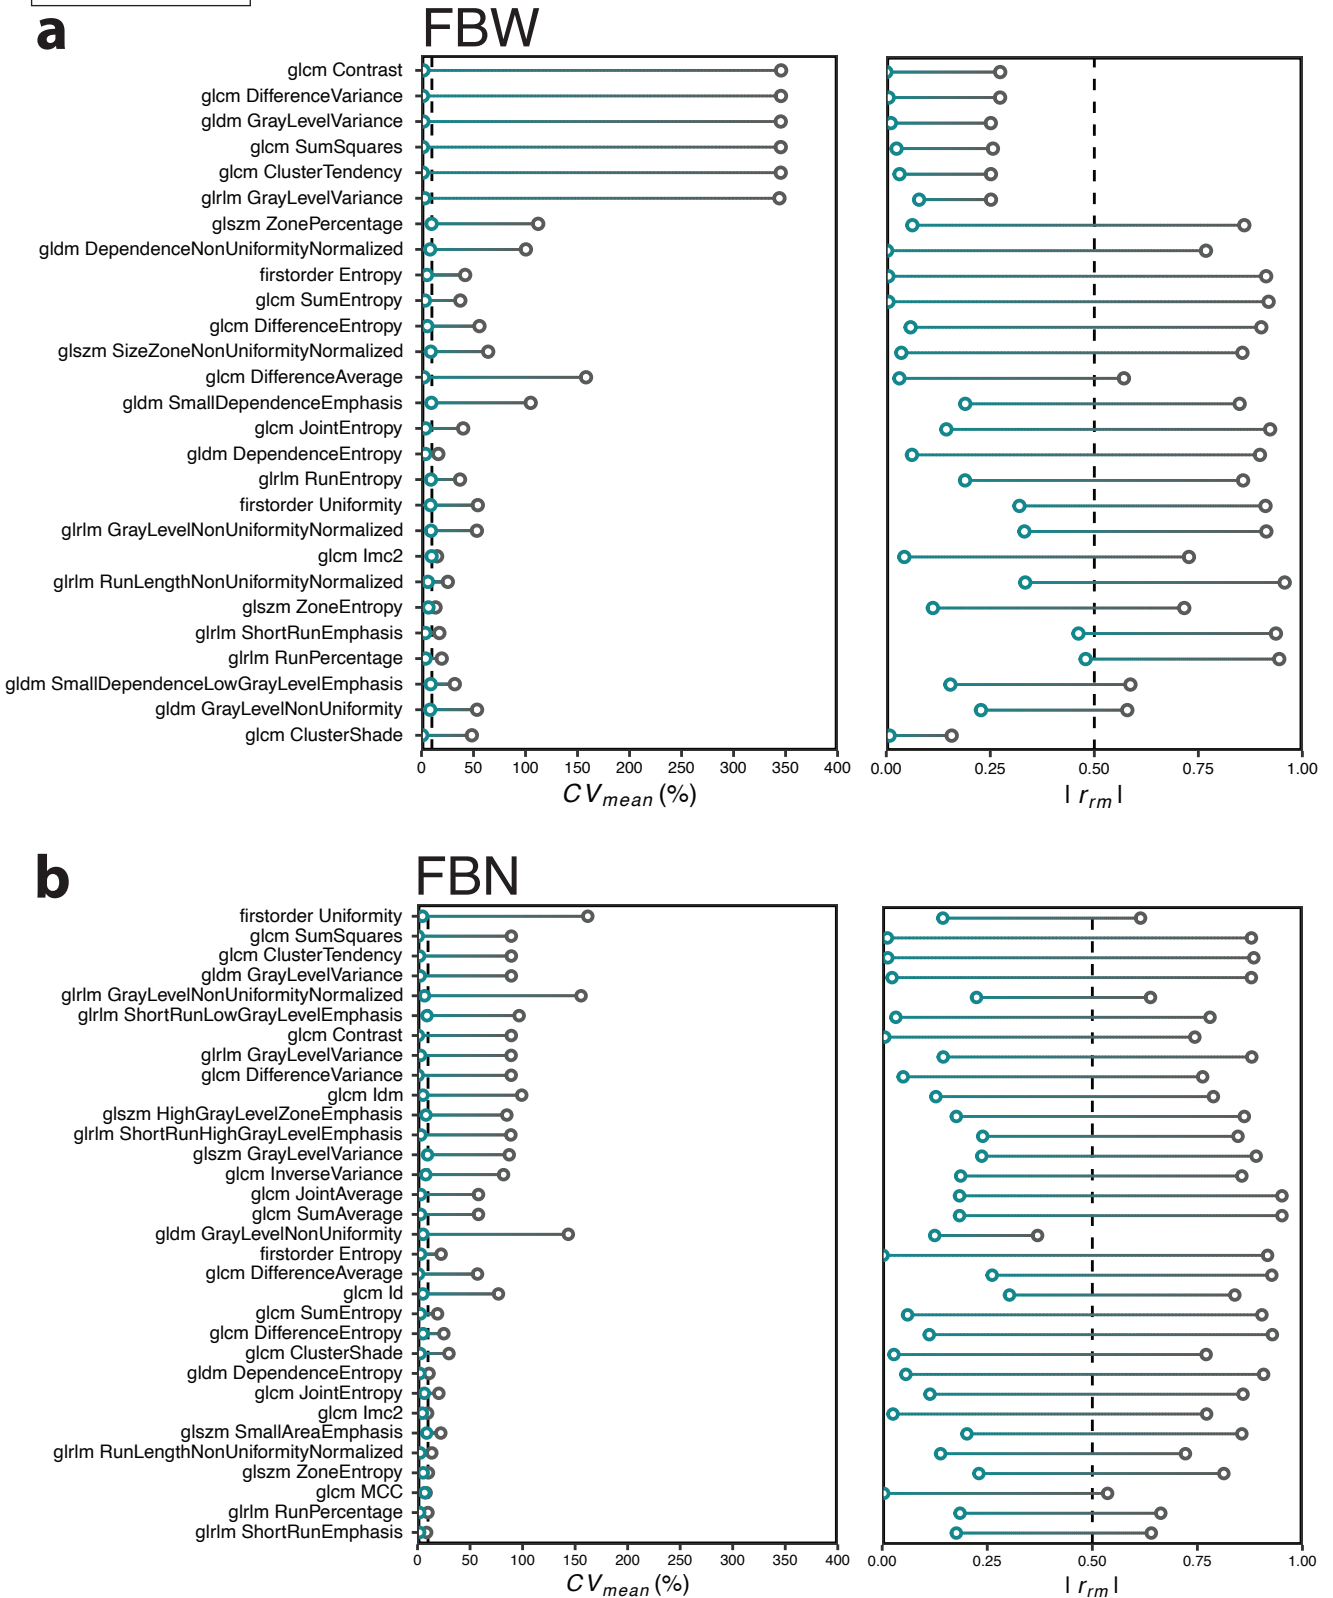

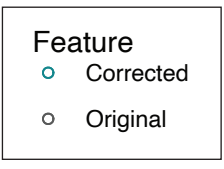

**c**

**Linear**

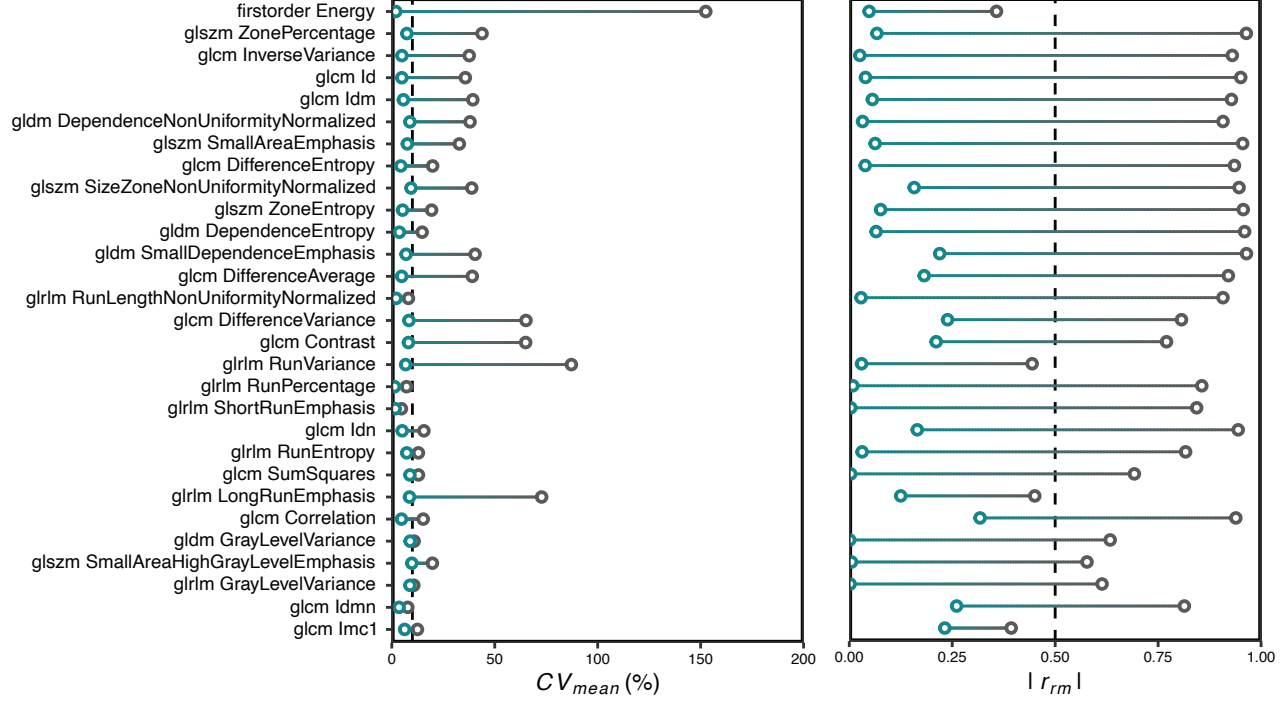

**d**

**Nearest-neighbour**

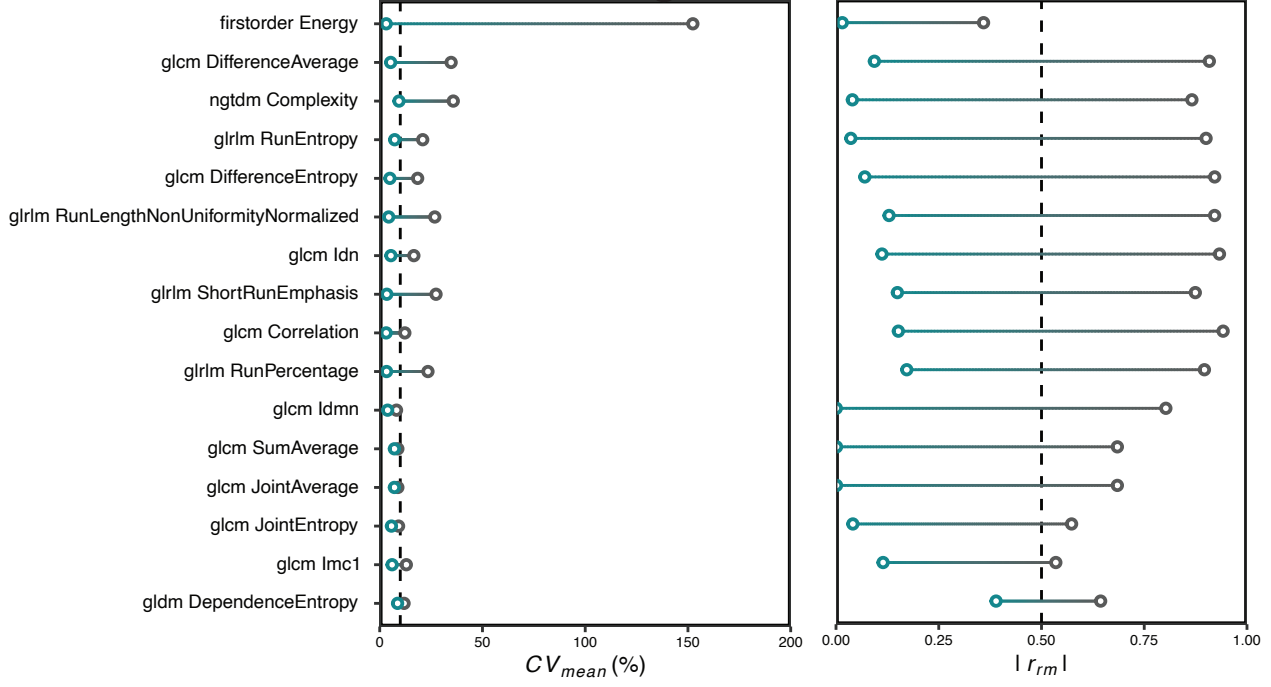

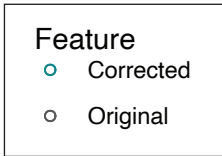

**e**

**B-spline**

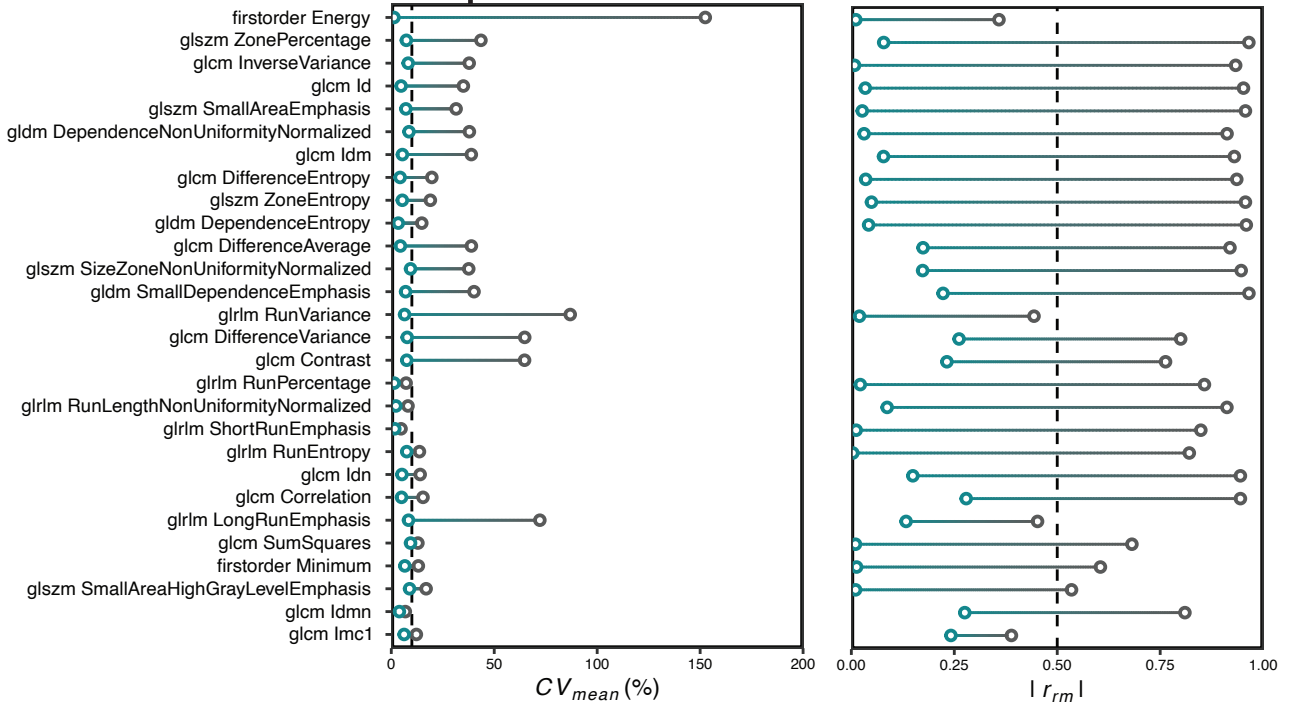

**f**

**Gaussian**

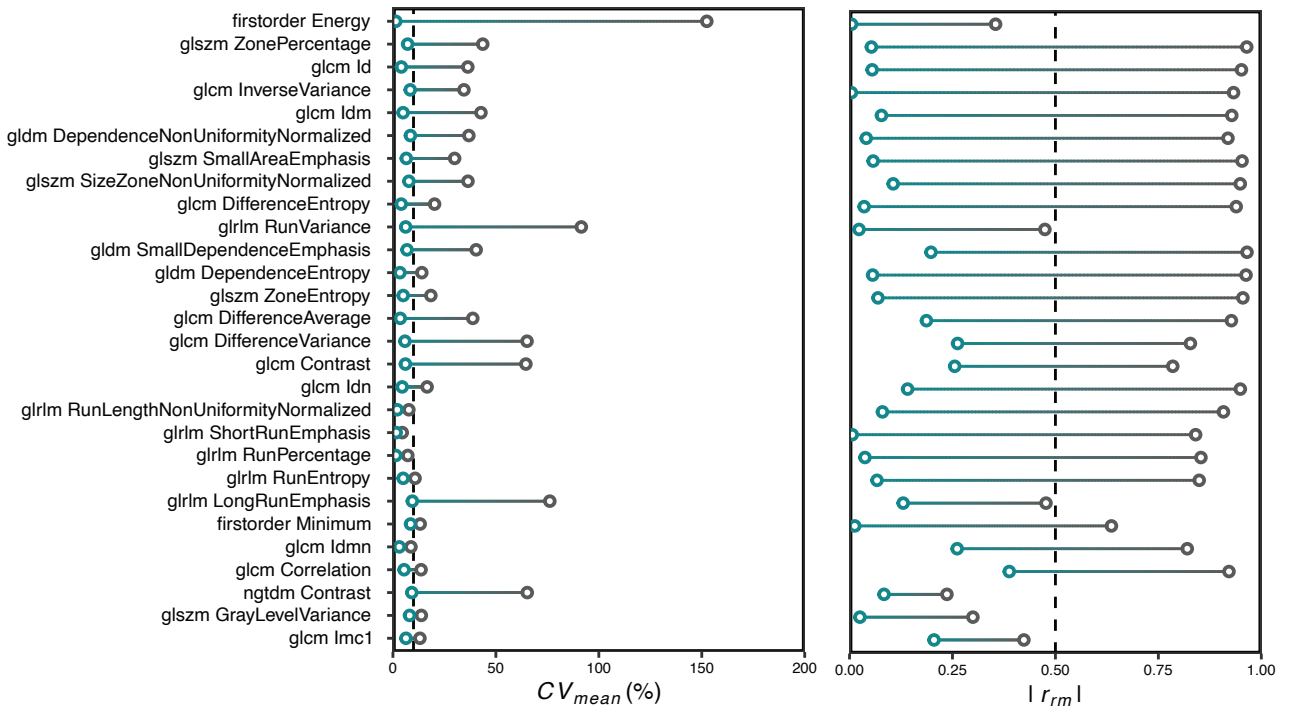



## Supplementary Figure SF10

Density plots quantifying the overall effect of correction on feature variability and correlation for correctable features, stratified by image processing scheme and cancer type.

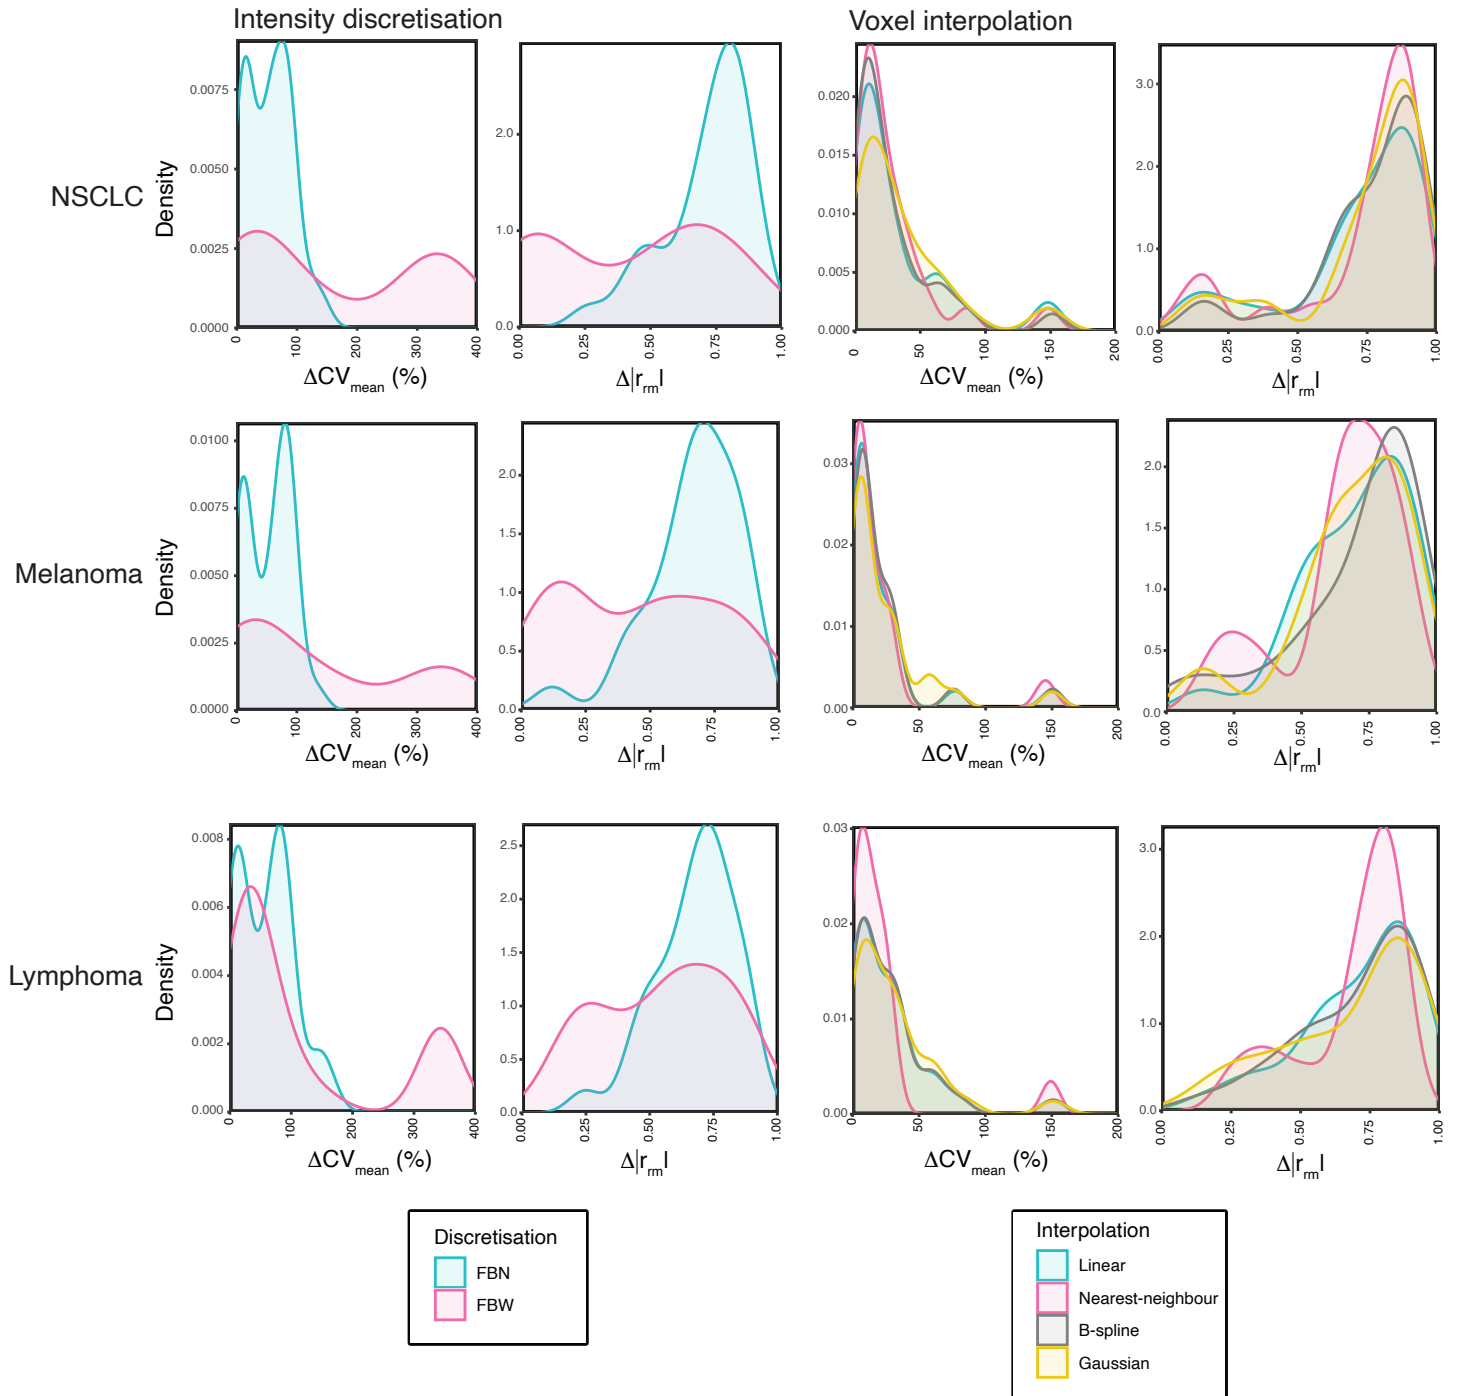

Supplement: 41598_2024_67239_MOESM1_ESM.pdf [file 41598_2024_67239_MOESM1_ESM.pdf]
